# Supplementary material
Source: PubMed Central journal article supplement (PMC6545112)
Supplement: NIHMS1020015-supplement-Supplemental.pdf [file NIHMS1020015-supplement-Supplemental.pdf]

## Supporting Information

Discovery of MD-224 as a First-in-Class, Highly Potent, and Efficacious  
Proteolysis Targeting Chimera (PROTAC) Degradator of Murine Double  
Minute 2 (MDM2)

Yangbing Li<sup>†‡¶</sup>, Jiuling Yang<sup>†^¶</sup>, Angelo Aguilar<sup>†¶</sup>, Donna McEachern<sup>¶</sup>, Sally  
Przybranowski<sup>¶</sup>, Liu Liu<sup>¶</sup>, Chao-Yie Yang<sup>¶</sup>, Mi Wang<sup>¶</sup>, Xin Han<sup>¶</sup>, Shaomeng Wang<sup>†‡¶\*</sup>

<sup>†</sup>The Rogel Cancer Center and Departments of <sup>+</sup>Medicinal Chemistry, <sup>^</sup>Pharmacology  
and <sup>¶</sup>Internal Medicine, University of Michigan, Ann Arbor, Michigan 48109, United

States.

## **Contents of Supporting Information:**

**Figure S1.** Evaluation of the effect of cereblon ligand lenalidomide on the activity of MDM2 inhibitor and degraders in MV4;11 cells.

**Figure S2.** qRT-PCR analysis mRNA levels of p53 target genes and *TP53* after treatment with the MDM2 inhibitor, **MI-1061** and the MDM2 degraders **MD-222** and **MD-224** in MV-4-11 cells.

**Figure S3.** <sup>1</sup>H NMR spectrum for MDM2 degrader **MD-224**.

**Figure S4.** UPLC-MS results for MDM2 degrader **MD-224**.

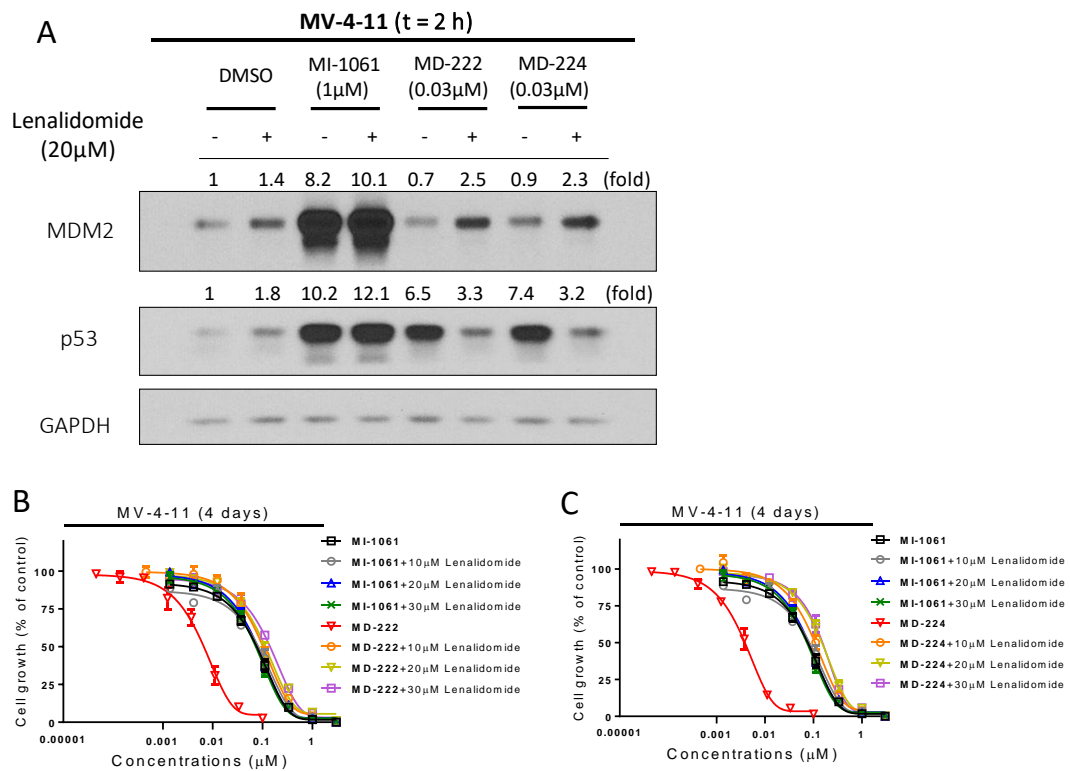

Figure S1. Activity of the MDM2 degraders is cereblon (CRBN)-binding dependent. MV-4-11 cells were treated with the MDM2 inhibitor **MI-1061**, and the degraders **MD-222** or **MD-224** for 2 h in the presence or absence of excess lenalidomide as a competitor: (A) Western blot data indicated that without lenalidomide competition, the MDM2 inhibitor **MI-1061** significantly accumulates both MDM2 and p53 proteins, while the MDM2 degraders degrade MDM2 and activate p53. Competition by 30  $\mu$ M lenalidomide clearly rescued MDM2 protein from degradation and reduced p53 protein level; (B) and (C) Competition by excess lenalidomide significantly reduces cell growth inhibition activity of **MD-224** and **MD-222** in cell viability assay but fails to change the activity of the MDM2 inhibitor, **MI-1061**.

**Figure S2.** qRT-PCR analysis of mRNA levels of p53 target genes and *TP53* after treatment with the MDM2 inhibitor **MI-1061** and the MDM2 degraders **MD-222** and **MD-224** in MV4;11 cells. **MD-222** and **MD-224** more effectively activate the transcription of p53 target genes compared with much lower concentrations of the inhibitor **MI-1061**.

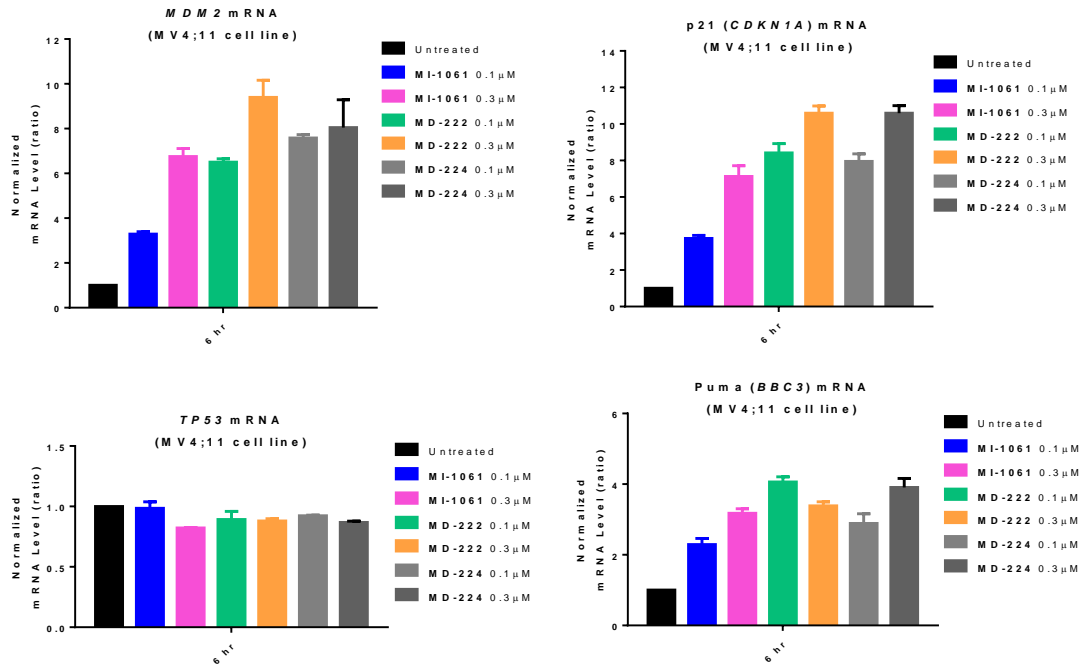

**Figure S3.**  $^1\text{H}$  NMR spectrum for MDM2 degrader MD-224.

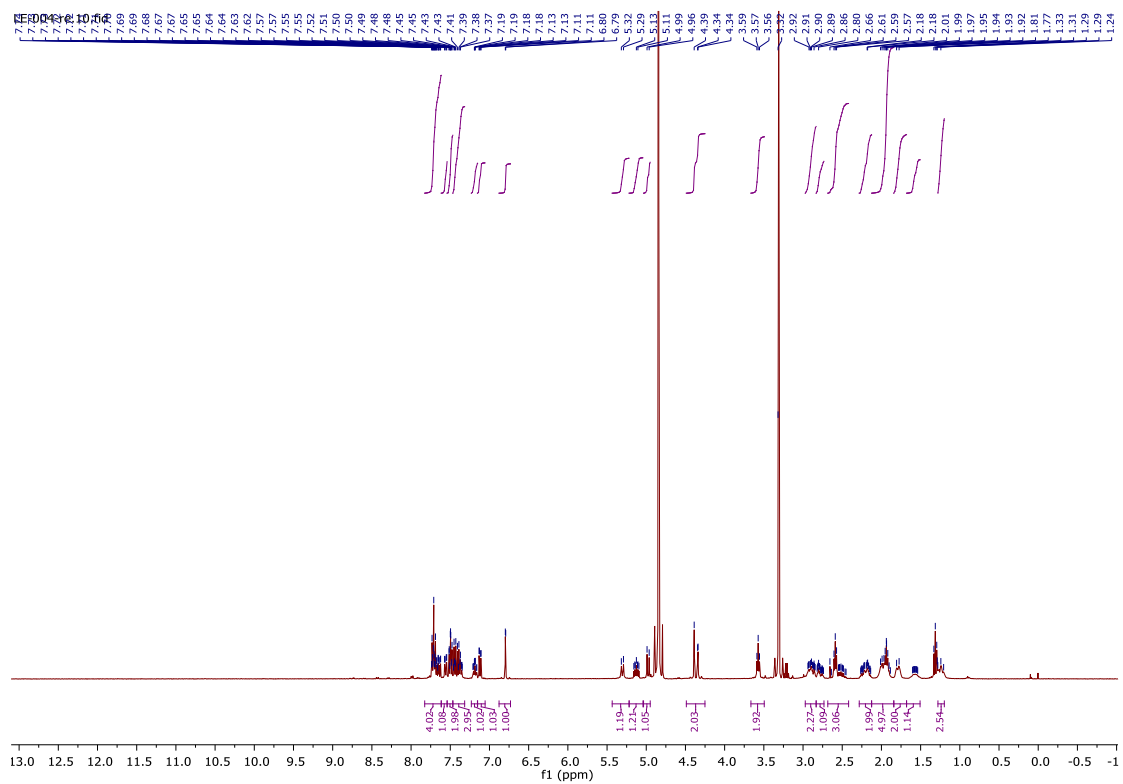

**Figure S4.** UPLC-MS results for MDM2 degrader **MD-224** (Original code name: LE-004).

| SAMPLE INFORMATION |             |                     |                               |
|--------------------|-------------|---------------------|-------------------------------|
| Sample Name:       | LE-004-2    | Acquired By:        | System                        |
| Sample Type:       | Unknown     | Date Acquired:      | 4/22/2016 1:03:51 AM EDT      |
| Vial:              | 2:A,4       | Acq. Method Set:    | 10 to 100% B 5min Delay 5 min |
| Injection #:       | 1           | Date Processed:     | 4/22/2016 8:56:01 AM EDT      |
| Injection Volume:  | 3.00 ul     | Processing Method:  | test                          |
| Run Time:          | 5.0 Minutes | Channel Name:       | 254.0nm                       |
| Sample Set Name:   | 2           | Proc. Chnl. Descr.: | PDA Spectrum (210-500)nm      |

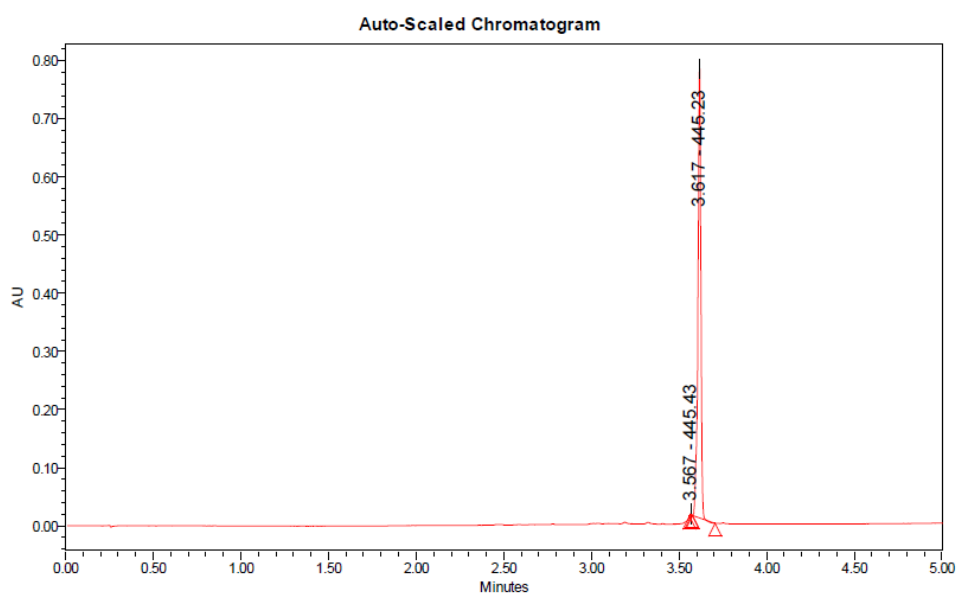

**Peak Results**

|   | RT    | Area   | Height | % Area | Base Peak (m/z) |
|---|-------|--------|--------|--------|-----------------|
| 1 | 3.567 | 1676   | 3078   | 0.18   | 445.43          |
| 2 | 3.617 | 911394 | 775553 | 99.82  | 445.23          |
